# Supplementary material for: Mesoporous uniform ammonium nickel phosphate hydrate nanostructures as high performance electrode materials for supercapacitors
Source: Royal Society of Chemistry journal article supplement (doi:10.1039/c3ce40712h), 2013-01-01
Supplement: c3ce40712h.pdf [file c3ce40712h.pdf]

## Electronic supplementary information (ESI)

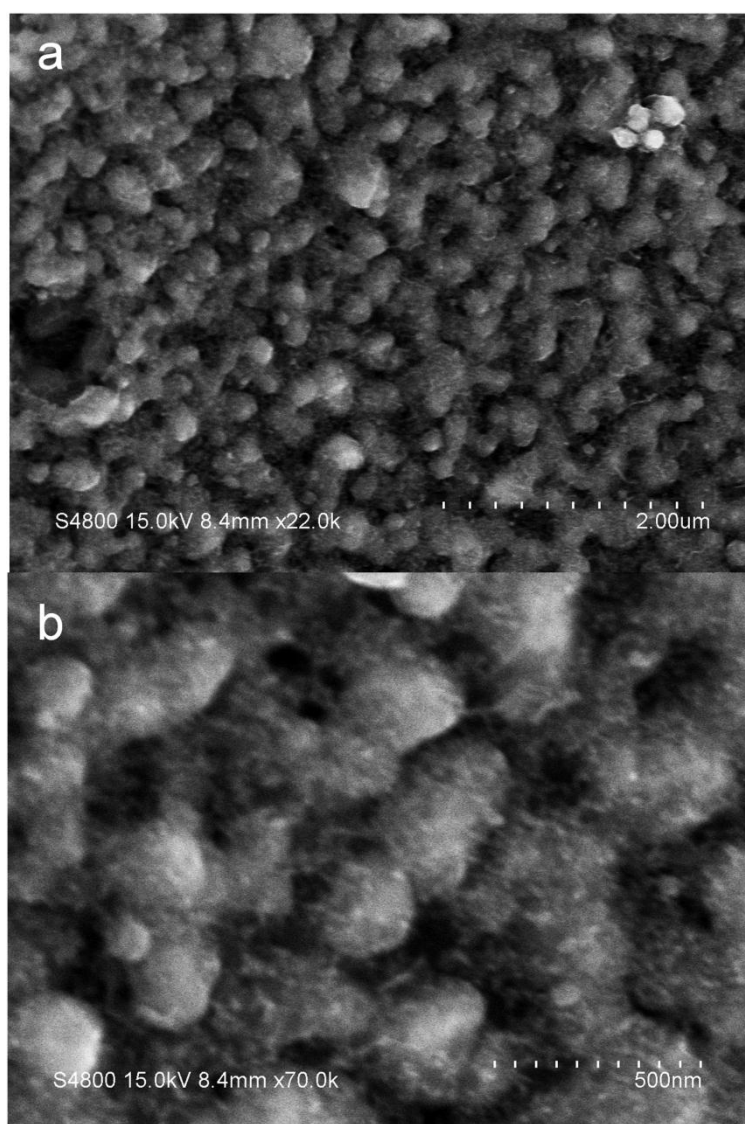

**Figure S1** SEM images of samples obtained after 3000 charge-discharge cycles.
